# Supplementary material for: Computational design and molecular modeling of the interaction of nicotinic acid hydrazide nickel-based complexes with H2S gas
Source: Royal Society of Chemistry journal article supplement (doi:10.1039/d2ra05456f), 2022-01-01
Supplement: d2ra05456f1.pdf [file d2ra05456f1.pdf]

## Supplementary information for:

# Computational design and molecular modeling of the interaction of nicotinic acid hydrazide nickel-based complexes with H<sub>2</sub>S gas

Hitler Louis <sup>a,b\*\*</sup>, Daniel Etiese <sup>a,b</sup>, Tomsmith O. Unimuke <sup>a,b</sup>, Aniekan E. Owen <sup>a,c</sup>,  
Abdulahi O. Rajee <sup>d</sup>, Terkumbur E. Gber <sup>a,b</sup>, Chioma M. Chima <sup>a,b</sup>, Ededet A. Eno <sup>a,b</sup>, and  
Emmanuel N. Nfor <sup>e</sup>

<sup>a</sup> Computational and Bio-Simulation Research Group, University of Calabar, Calabar, Nigeria

<sup>b</sup> Department of Pure and Applied Chemistry, Faculty of Physical Sciences, University of Calabar,  
Calabar, Nigeria

<sup>c</sup> Department of Chemistry, Akwa-Ibom State University, Uyo, Nigeria

<sup>d</sup> Department of Chemistry, University of Ilorin, Ilorin, Nigeria

<sup>e</sup> Department of Chemistry, University of Buea, Buea, Cameroon

\*Corresponding authors' email: [louismuzong@gmail.com](mailto:louismuzong@gmail.com)

## Spectroscopy

### 1. Ligand

Yield 86 % , Melting point: 209 °C, C<sub>15</sub>H<sub>12</sub>N<sub>4</sub>O, m/e 264.10, Elemental Analysis; *Found*; C, 68.17; H, 4.58; N, 21.20; O, 6.05, *Calculated*: C, 68.38; H, 4.69; N, 21.18; O, 6.02, mp 214 °C ;IR (KBr) (ν, cm<sup>-1</sup>): 3178 (NH), 1657 (CO), 1600 (C=N), 1575 (C=C);<sup>1</sup>H NMR (400 MHz, DMSO-d<sub>6</sub>) δ: 7.13–8.76 (m, 7H, Ar-H + [nicotine ring]), 7.87 (s, 1H, indole-H), 8.63 (s, 1H, CH=NNH), 9.09 (s, 1H, Nicotine [N=CH-CCO]), 11.56 (br.s, 1H, CONHN, exchangeable), 11.64 (br.s, 1H, NH-indole). The X-ray crystal information is presented in table S1 and Figure S1 of the supplementary material.

### 2. Complex

Yield 89%. Melting point: 237 °C; IR (KBr)(ν, cm<sup>-1</sup>): 1590 (C=O), 1540 (C=N), 1332, 1025, 540 (Zn-O), 481 (Zn-N), m/e (%) 588.1 (100) ; Elemental analysis for C<sub>30</sub>H<sub>24</sub>ZnN<sub>8</sub>O<sub>2</sub> (%): Calculated C 61.08, H 3.42, N 18.99, O 5.42; Found: C 61.23, H 3.45, N 19.01, O 5.46. <sup>1</sup>H-NMR (400 MHz, DMSO-d<sub>6</sub>, δ, ppm): 6.97(m, 3H, Ar-H), 6.99(s, J = 8 Hz, 2H, Ar-H), 7.13(d, J = 8 Hz, 2H, Ar-H), 7.40(t, J = 8 Hz, 2H, Ar-H), 7.44(sbr, 3H, Ar-H), 7.60(d, J = 8 Hz, 1H, Ar-H), 7.81(s, 2H, indole-H), 8.29(s, 1H, Ar-H), 8.31(d, 2H, Ar-H), 9.00(s, 2H, Nicotine [N=CH-CCO]), 11.38(s, 2H, N-H), 11.60 (br.s, 2H, NH-indole).

### Crystal structure of the ligand (L1)

The molecular structure of L1 is depicted in **Figure S1a** along with the atomic numbering scheme. The crystal structure refinement data for L1 is given in **Table S1**. The L1 has two independent molecules having different torsion angle in the asymmetric unit of the crystal designated as molecule A (green) with a planar structure, molecule B (blue) with a twisted structure. There are a total of 8 molecules of  $C_{15}H_{12}N_4O$  in the unit cell. The Schiff base L1 crystallizes in the monoclinic system in space group  $P2_1/c$ . In L1, the bond distance C(21)-O(1) is equal to 1.236(3) Å indicating its double bond nature. The bond lengths N(6)-N(7) and C(21)-N(6) are equal to 1.392(3)Å and 1.342(3)Å, respectively while C(21)-N(6)-N(7) equal to 120.63(17). Most of bond distances and angles were within common ranges of normal covalent bonds. The intermolecular hydrogen bond between (indole) N4-H...O1 (carbonyl) was observed for L1 molecule. The 6-membered aromatic rings are stacked *via* weak  $\Pi$ -interaction, and stacked rings of B are perpendicular to C=N bond of A.

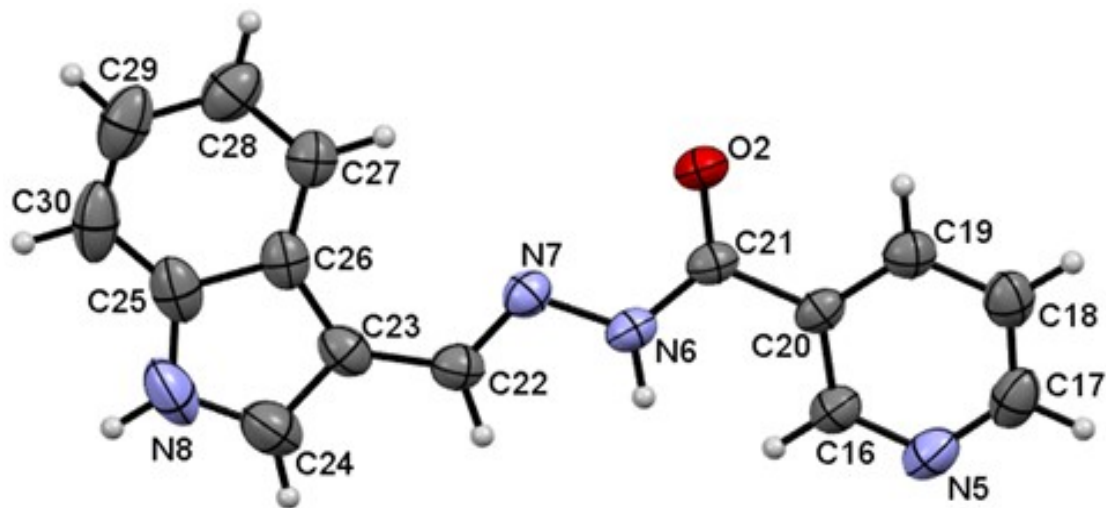

(a)

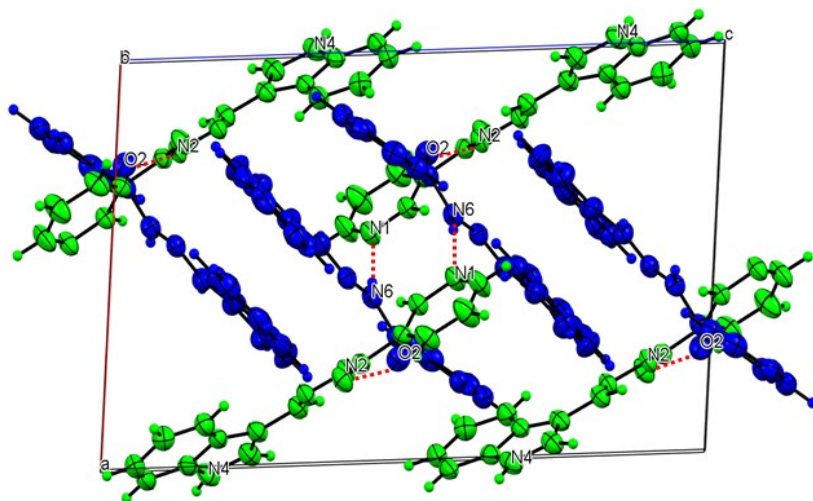

(b)

**Figure S1**(a) Molecular structure with atom numbering scheme (b) Crystal packing of distinguished Crystallographic independent molecules (A=green, B=blue) and molecular structures of for L1.

**Table S1.** Crystal data and structure refinement of **L1**

|                                           |                      |
|-------------------------------------------|----------------------|
| Empirical formula                         | $C_{30}H_{24}N_8O_2$ |
| Formula weight                            | 528.57               |
| Temperature (K)                           | 173                  |
| Crystal system                            | monoclinic           |
| Space group                               | $P2_1/c$ (# 14)      |
| $a$ , (Å)                                 | 11.4069(18)          |
| $b$ , (Å)                                 | 12.822(2)            |
| $c$ , (Å)                                 | 18.149(3)            |
| $\alpha$ (°)                              | 90.0000              |
| $\beta$ (°)                               | 94.810(4)            |
| $\gamma$ (°)                              | 90.0000              |
| Volume (Å <sup>3</sup> )                  | 2645.1(7)            |
| $Z$                                       | 4                    |
| $\rho_{\text{calc}}$ (g/cm <sup>3</sup> ) | 1.327                |
| $\mu$ (mm <sup>-1</sup> )                 | 0.088                |
| $F(000)$                                  | 1104                 |
| Crystal size (mm <sup>3</sup> )           | 0.12 × 0.11 × 0.1    |

|                                     |                                       |
|-------------------------------------|---------------------------------------|
| Radiation                           | Mo K $\alpha$ ( $\lambda = 0.71073$ ) |
| T <sub>min</sub> , T <sub>max</sub> | 0.93, 0.98                            |
| No. of reflections                  | 5116                                  |
| No. of parameters                   | 362                                   |
| Goodness of fit                     | 1.127                                 |
| R <sub>1</sub> [I>2 $\sigma$ (I)]   | 0.0367                                |
| WR <sub>2</sub>                     | 0.1040                                |

**Table S2:** Second order perturbation theory analysis of fock matrix in NBO basis estimated at DFT/ $\omega$ B97XD/Gen

| Donor Orbital                         | Acceptor Orbital     | E <sup>2</sup> Kcal/mol | E(j)-E(i) | F(i,j) |
|---------------------------------------|----------------------|-------------------------|-----------|--------|
| <b>L<sub>1</sub></b>                  |                      |                         |           |        |
| $\pi^*$ N4 - C5                       | $\pi^*$ C7 - C8      | 62.43                   | 0.02      | 0.067  |
| $\pi^*$ C1 - O2                       | $\pi^*$ C12-C16      | 37.35                   | 0.04      | 0.071  |
| <b>L<sub>2</sub></b>                  |                      |                         |           |        |
| $\pi^*$ C1 - O2                       | $\pi^*$ C12-C16      | 71.32                   | 0.02      | 0.071  |
| LP(2) S 11                            | $\pi^*$ C7 - C8      | 33.17                   | 0.38      | 0.101  |
| LP(2) S 13                            | $\pi^*$ C14-C15      | 32.15                   | 0.38      | 0.101  |
| <b>L<sub>3</sub></b>                  |                      |                         |           |        |
| $\pi^*$ C1 - O2                       | $\pi^*$ C12-C16      | 44.01                   | 0.03      | 0.072  |
| LP (2) S 11                           | $\pi^*$ C7 - C8      | 33.20                   | 0.38      | 0.101  |
| <b>L<sub>4</sub></b>                  |                      |                         |           |        |
| $\pi^*$ C9 - C10                      | $\pi^*$ C7 - C8      | 121.46                  | 0.01      | 0.069  |
| LP (2) N 22                           | $\pi^*$ C12 - C13    | 67.78                   | 0.26      | 0.127  |
| $\pi^*$ C1 - O2                       | $\pi^*$ C11 - C14    | 66.07                   | 0.04      | 0.083  |
| <b>L<sub>1</sub>Ni</b>                |                      |                         |           |        |
| $\pi$ C7 - C13                        | $\pi^*$ O2 - C6      | 41.69                   | 0.33      | 0.108  |
| LP (2) O 2                            | LP*(6) Ni 45         | 20.47                   | 1.02      | 0.131  |
| <b>L<sub>2</sub>Ni</b>                |                      |                         |           |        |
| $\pi^*$ C35-C41                       | $\pi^*$ C36-C37      | 66.79                   | 0.02      | 0.074  |
| $\pi^*$ C7-C13                        | $\pi^*$ C8-C9        | 57.27                   | 0.03      | 0.075  |
| LP (1) N 4                            | LP*(6) Ni 47         | 22.78                   | 1.01      | 0.138  |
| <b>L<sub>3</sub>Ni</b>                |                      |                         |           |        |
| $\pi^*$ C7 - C13                      | $\pi^*$ C8 - C9      | 56.34                   | 0.03      | 0.075  |
| $\pi$ C7 - C13                        | $\pi^*$ O2 - C6      | 41.09                   | 0.33      | 0.107  |
| <b>L<sub>4</sub>Ni</b>                |                      |                         |           |        |
| $\pi^*$ C17 - C23                     | $\pi^*$ C18 - C19    | 51.01                   | 0.03      | 0.075  |
| $\pi$ C 18 - C 19                     | LP*(2) N 46          | 92.86                   | 0.13      | 0.123  |
| <b>L<sub>1</sub>Ni-H<sub>2</sub>S</b> |                      |                         |           |        |
| LP (2) O 25                           | $\sigma^*$ C9 - H12  | 1227.96                 | 0.07      | 0.291  |
| $\pi^*$ C18 - C24                     | $\sigma^*$ C9 - H12  | 1211.30                 | 0.09      | 0.654  |
| <b>L<sub>2</sub>Ni-H<sub>2</sub>S</b> |                      |                         |           |        |
| $\sigma$ C18 - H21                    | $\sigma^*$ C19 - H22 | 7484.17                 | 0.29      | 1.304  |
| $\sigma$ C36 - C37                    | $\pi^*$ C25 - C46    | 15641.30                | 0.33      | 2.237  |
| $\sigma$ C17 - C23                    | $\sigma^*$ C19 - H22 | 3289.88                 | 0.93      | 1.562  |
| <b>L<sub>3</sub>Ni-H<sub>2</sub>S</b> |                      |                         |           |        |
| $\sigma$ N5 - H14                     | $\sigma^*$ C36 - H39 | 5278.79                 | 0.03      | 0.379  |

|                                       |                      |         |      |       |
|---------------------------------------|----------------------|---------|------|-------|
| LP (1) S 48                           | $\sigma^*$ C9 - H12  | 2093.84 | 0.57 | 0.979 |
| <b>L<sub>4</sub>Ni-H<sub>2</sub>S</b> |                      |         |      |       |
| LP (1) S 48                           | $\sigma^*$ S48 - H50 | 7726.42 | 0.07 | 0.664 |
| $\sigma$ S48 - H49                    | $\sigma^*$ S48 - H49 | 4315.68 | 0.16 | 0.735 |
| $\sigma$ S48 - H49                    | $\sigma^*$ C33 - C41 | 8244.44 | 0.02 | 0.394 |

**Table S3:** Thermodynamic properties for studied adsorptions

| Parameters                         | L <sub>1</sub> Ni | H <sub>2</sub> S | Product(L <sub>1</sub> Ni-H <sub>2</sub> S) |
|------------------------------------|-------------------|------------------|---------------------------------------------|
| E <sub>0</sub>                     | -2266.784910      | -399.399992      | -2666.243780                                |
| E <sub>zpc</sub>                   | 0.362892          | 0.015678         | 0.385088                                    |
| E <sub>tot</sub>                   | 0.386786          | 0.018525         | 0.411843                                    |
| H <sub>corr</sub>                  | 0.387730          | 0.019470         | 0.412788                                    |
| G <sub>corr</sub>                  | 0.306314          | -0.003877        | 0.325255                                    |
| E <sub>o</sub> + E <sub>ZpE</sub>  | -2266.422019      | -399.384314      | -2665.858692                                |
| E <sub>o</sub> + E <sub>tot</sub>  | -2266.398124      | -399.381467      | -2665.831937                                |
| E <sub>o</sub> + H <sub>corr</sub> | -2266.397180      | -399.380522      | -2665.830993                                |
| E <sub>o</sub> + G <sub>corr</sub> | -2266.478597      | -399.403869      | -2665.918526                                |
| $\Delta_f H^0(298k)$               |                   |                  | 35.9821 kcal/mol                            |
| $\Delta_r G^0(298k)$               |                   |                  | 24.3477 kcal/mol                            |
|                                    |                   |                  |                                             |
|                                    | L <sub>2</sub> Ni | H <sub>2</sub> S | Product(L <sub>2</sub> Ni-H <sub>2</sub> S) |
| E <sub>0</sub>                     | -3558.731314      | -399.399992      | -3958.188657                                |
| E <sub>zpc</sub>                   | 0.346838          | 0.015678         | 0.368096                                    |
| E <sub>tot</sub>                   | 0.373048          | 0.018525         | 0.397139                                    |
| H <sub>corr</sub>                  | 0.373992          | 0.019470         | 0.398084                                    |
| G <sub>corr</sub>                  | 0.286051          | -0.003877        | 0.304812                                    |
| E <sub>o</sub> + E <sub>ZpE</sub>  | -3558.384477      | -399.384314      | -3957.820561                                |
| E <sub>o</sub> + E <sub>tot</sub>  | -3558.358266      | -399.381467      | -3957.791518                                |
| E <sub>o</sub> + H <sub>corr</sub> | -3558.357322      | -399.380522      | -3957.790574                                |
| E <sub>o</sub> + G <sub>corr</sub> | -3558.445263      | -399.403869      | -3957.883846                                |
| $\Delta_f H^0(298k)$               |                   |                  | 35.6033 kcal/mol                            |
| $\Delta_r G^0(298k)$               |                   |                  | 23.4389 kcal/mol                            |
|                                    |                   |                  |                                             |
|                                    | L <sub>3</sub> Ni | H <sub>2</sub> S | Product(L <sub>3</sub> Ni-H <sub>2</sub> S) |
| E <sub>0</sub>                     | -2912.766458      | -399.399992      | -3312.225927                                |
| E <sub>zpc</sub>                   | 0.355767          | 0.015678         | 0.378181                                    |
| E <sub>tot</sub>                   | 0.380530          | 0.018525         | 0.405647                                    |
| H <sub>corr</sub>                  | 0.381474          | 0.019470         | 0.406592                                    |
| G <sub>corr</sub>                  | 0.297818          | -0.003877        | 0.317557                                    |
| E <sub>o</sub> + E <sub>ZpE</sub>  | -2912.410690      | -399.384314      | -3311.847746                                |
| E <sub>o</sub> + E <sub>tot</sub>  | -2912.385928      | -399.381467      | -3311.820279                                |
| E <sub>o</sub> + H <sub>corr</sub> | -2912.384984      | -399.380522      | -3311.819335                                |
| E <sub>o</sub> + G <sub>corr</sub> | -2912.468640      | -399.403869      | -3311.908370                                |
| $\Delta_f H^0(298k)$               |                   |                  | 36.3453 kcal/mol                            |
| $\Delta_r G^0(298k)$               |                   |                  | 24.2133 kcal/mol                            |
|                                    |                   |                  |                                             |
|                                    | L <sub>4</sub> Ni | H <sub>2</sub> S | Product(L <sub>4</sub> Ni-H <sub>2</sub> S) |
| E <sub>0</sub>                     | -2225.730381      | -399.399992      | -2625.177484                                |
| E <sub>zpc</sub>                   | 0.358415          | 0.015678         | 0.377741                                    |

|                             |              |             |                  |
|-----------------------------|--------------|-------------|------------------|
| $E_{\text{tot}}$            | 0.382320     | 0.018525    | 0.404823         |
| $H_{\text{corr}}$           | 0.383264     | 0.019470    | 0.405767         |
| $G_{\text{corr}}$           | 0.301689     | -0.003877   | 0.317077         |
| $E_o + E_{\text{ZPE}}$      | -2225.371966 | -399.384314 | -2624.799743     |
| $E_o + E_{\text{tot}}$      | -2225.348061 | -399.381467 | -2624.772661     |
| $E_o + H_{\text{corr}}$     | -2225.347117 | -399.380522 | -2624.771717     |
| $E_o + G_{\text{corr}}$     | -2225.428693 | -399.403869 | -2624.860407     |
| $\Delta_f H^0(298\text{k})$ |              |             | 29.7615 kcal/mol |
| $\Delta_r G^0(298\text{k})$ |              |             | 18.8009 kcal/mol |
|                             |              |             |                  |

Table S4- S: Atomic coordinates of the studied compounds

| Standard orientation: |               |             |                         |           |           |  |
|-----------------------|---------------|-------------|-------------------------|-----------|-----------|--|
| Center Number         | Atomic Number | Atomic Type | Coordinates (Angstroms) |           |           |  |
|                       |               |             | X                       | Y         | Z         |  |
| 1                     | 6             | 0           | 1.256319                | 1.012120  | -0.000481 |  |
| 2                     | 8             | 0           | 1.353475                | 2.220840  | -0.000220 |  |
| 3                     | 7             | 0           | -0.005637               | 0.446900  | -0.001169 |  |
| 4                     | 7             | 0           | -0.230677               | -0.881142 | -0.000620 |  |
| 5                     | 6             | 0           | -1.429203               | -1.332699 | -0.000259 |  |
| 6                     | 1             | 0           | -1.507333               | -2.415584 | 0.000603  |  |
| 7                     | 6             | 0           | -2.703153               | -0.642680 | -0.000079 |  |
| 8                     | 6             | 0           | -3.972413               | -1.141305 | -0.000101 |  |
| 9                     | 6             | 0           | -4.849614               | -0.017580 | 0.000338  |  |
| 10                    | 6             | 0           | -4.055290               | 1.080268  | 0.000634  |  |
| 11                    | 8             | 0           | -2.751502               | 0.719733  | 0.000512  |  |
| 12                    | 6             | 0           | 2.439215                | 0.129714  | -0.000201 |  |
| 13                    | 8             | 0           | 3.618190                | 0.805393  | 0.000319  |  |
| 14                    | 6             | 0           | 4.601263                | -0.104249 | 0.000529  |  |
| 15                    | 6             | 0           | 4.096653                | -1.365349 | 0.000481  |  |
| 16                    | 6             | 0           | 2.681410                | -1.214435 | 0.000103  |  |
| 17                    | 1             | 0           | -0.766716               | 1.117616  | -0.000878 |  |
| 18                    | 1             | 0           | -4.241395               | -2.185817 | -0.000422 |  |
| 19                    | 1             | 0           | -5.927524               | -0.025366 | 0.000458  |  |
| 20                    | 1             | 0           | -4.250912               | 2.139319  | 0.000954  |  |
| 21                    | 1             | 0           | 5.605334                | 0.287338  | 0.000712  |  |
| 22                    | 1             | 0           | 4.659928                | -2.284682 | 0.000607  |  |
| 23                    | 1             | 0           | 1.930383                | -1.983693 | -0.000183 |  |

## Standard orientation:

| Center<br>Number            | Atomic<br>Number | Atomic<br>Type | Coordinates (Angstroms) |           |           |
|-----------------------------|------------------|----------------|-------------------------|-----------|-----------|
|                             |                  |                | X                       | Y         | Z         |
| 1                           | 7                | 0              | 1.804553                | 0.034958  | -0.995923 |
| 2                           | 8                | 0              | 0.012454                | -1.531687 | -0.212355 |
| 3                           | 8                | 0              | -1.894360               | -0.833600 | -1.688415 |
| 4                           | 7                | 0              | -0.705652               | 0.907644  | -0.238089 |
| 5                           | 7                | 0              | 2.125312                | -0.902144 | -0.044492 |
| 6                           | 6                | 0              | 1.093872                | -1.697328 | 0.352456  |
| 7                           | 6                | 0              | 2.255327                | -3.117874 | 2.183358  |
| 8                           | 6                | 0              | 0.406737                | -4.269664 | 2.576171  |
| 9                           | 6                | 0              | 1.708786                | -4.153242 | 2.971868  |
| 10                          | 1                | 0              | 3.272511                | -2.757595 | 2.221360  |
| 11                          | 1                | 0              | -0.397567               | -4.916327 | 2.887942  |
| 12                          | 1                | 0              | 2.207141                | -4.739650 | 3.726961  |
| 13                          | 6                | 0              | 1.241145                | -2.684750 | 1.368162  |
| 14                          | 8                | 0              | 0.111750                | -3.391290 | 1.615028  |
| 15                          | 1                | 0              | 3.053495                | -0.958354 | 0.336874  |
| 16                          | 6                | 0              | 2.782268                | 0.772647  | -1.412086 |
| 17                          | 1                | 0              | 2.523977                | 1.494043  | -2.182132 |
| 18                          | 6                | 0              | 5.036141                | 0.167314  | -0.210831 |
| 19                          | 6                | 0              | 6.132763                | 1.640283  | -1.439112 |
| 20                          | 6                | 0              | 6.308020                | 0.718463  | -0.445343 |
| 21                          | 1                | 0              | 4.839802                | -0.593292 | 0.530279  |
| 22                          | 1                | 0              | 6.817444                | 2.297417  | -1.952008 |
| 23                          | 1                | 0              | 7.234802                | 0.466680  | 0.043952  |
| 24                          | 6                | 0              | 4.158459                | 0.794037  | -1.076313 |
| 25                          | 8                | 0              | 4.859372                | 1.702232  | -1.818004 |
| 26                          | 6                | 0              | -2.618549               | -0.138194 | -0.953358 |
| 27                          | 6                | 0              | -4.663027               | -1.292956 | -1.703503 |
| 28                          | 6                | 0              | -5.070697               | 0.312391  | -0.194985 |
| 29                          | 1                | 0              | -4.295849               | -2.027476 | -2.401185 |
| 30                          | 6                | 0              | -6.221076               | -0.278222 | -0.574535 |
| 31                          | 1                | 0              | -4.987791               | 1.114561  | 0.520383  |
| 32                          | 1                | 0              | -7.254953               | -0.136290 | -0.309279 |
| 33                          | 7                | 0              | -2.068939               | 0.841077  | -0.208708 |
| 34                          | 1                | 0              | -2.604556               | 1.434767  | 0.412358  |
| 35                          | 6                | 0              | -0.158396               | 1.821680  | 0.480972  |
| 36                          | 1                | 0              | 0.919109                | 1.881095  | 0.407664  |
| 37                          | 6                | 0              | -0.066107               | 3.712751  | 2.140813  |
| 38                          | 6                | 0              | -2.243996               | 3.823563  | 2.509910  |
| 39                          | 6                | 0              | -1.063550               | 4.393658  | 2.872360  |
| 40                          | 1                | 0              | 0.998242                | 3.888874  | 2.164508  |
| 41                          | 1                | 0              | -3.265962               | 4.005681  | 2.800186  |
| 42                          | 1                | 0              | -0.932783               | 5.201964  | 3.573768  |
| 43                          | 6                | 0              | -0.702971               | 2.766331  | 1.380900  |
| 44                          | 8                | 0              | -2.050818               | 2.839707  | 1.610706  |
| 45                          | 28               | 0              | -0.088561               | -0.347017 | -1.638012 |
| 46                          | 6                | 0              | -4.031506               | -0.350990 | -0.934622 |
| 47                          | 8                | 0              | -5.967916               | -1.254081 | -1.489526 |
| Rotational constants (GHZ): |                  |                | 0.1601282               | 0.0889583 | 0.0762542 |





Standard orientation:

| Center Number | Atomic Number | Atomic Type | Coordinates (Angstroms) |           |           |
|---------------|---------------|-------------|-------------------------|-----------|-----------|
|               |               |             | X                       | Y         | Z         |
| 1             | 7             | 0           | 1.754088                | 0.007487  | -0.744125 |
| 2             | 8             | 0           | -0.097893               | -1.574795 | -0.351279 |
| 3             | 8             | 0           | -1.913965               | -0.566324 | -1.651966 |
| 4             | 7             | 0           | -0.689654               | 0.779059  | 0.124963  |
| 5             | 7             | 0           | 2.044640                | -1.148472 | -0.078001 |
| 6             | 6             | 0           | 0.970939                | -1.967283 | 0.115848  |
| 7             | 6             | 0           | 2.249615                | -3.844482 | 1.332888  |
| 8             | 6             | 0           | 0.424678                | -5.047433 | 1.676322  |
| 9             | 6             | 0           | 1.773596                | -5.053502 | 1.883929  |
| 10            | 1             | 0           | 3.278192                | -3.515590 | 1.312521  |
| 11            | 1             | 0           | -0.356082               | -5.749202 | 1.922871  |
| 12            | 1             | 0           | 2.345559                | -5.825482 | 2.372984  |
| 13            | 6             | 0           | 1.150931                | -3.196285 | 0.825935  |
| 14            | 8             | 0           | 0.037855                | -3.937238 | 1.040502  |
| 15            | 1             | 0           | 2.969599                | -1.340817 | 0.264164  |
| 16            | 6             | 0           | 2.729480                | 0.830959  | -0.922539 |
| 17            | 1             | 0           | 2.492370                | 1.725456  | -1.486303 |
| 18            | 6             | 0           | 4.962094                | -0.109039 | 0.096035  |
| 19            | 6             | 0           | 6.064976                | 1.677714  | -0.585061 |
| 20            | 6             | 0           | 6.232949                | 0.496740  | 0.077927  |
| 21            | 1             | 0           | 4.762558                | -1.065487 | 0.554360  |
| 22            | 1             | 0           | 6.750692                | 2.467136  | -0.847511 |
| 23            | 1             | 0           | 7.151000                | 0.114651  | 0.493835  |
| 24            | 6             | 0           | 4.097049                | 0.740093  | -0.565572 |
| 25            | 8             | 0           | 4.801576                | 1.839699  | -0.968498 |
| 26            | 6             | 0           | -2.597256               | -0.148675 | -0.705119 |
| 27            | 6             | 0           | -4.717420               | -0.907021 | -1.737836 |
| 28            | 6             | 0           | -4.978606               | -0.116775 | 0.339241  |
| 29            | 1             | 0           | -4.420930               | -1.251494 | -2.715091 |
| 30            | 6             | 0           | -6.165469               | -0.508450 | -0.165339 |
| 31            | 1             | 0           | -4.826909               | 0.289592  | 1.326535  |
| 32            | 1             | 0           | -7.171081               | -0.524122 | 0.219082  |
| 33            | 7             | 0           | -2.034025               | 0.618537  | 0.245879  |
| 34            | 1             | 0           | -2.544919               | 1.049817  | 1.005003  |
| 35            | 6             | 0           | -0.146596               | 1.649442  | 0.896658  |
| 36            | 1             | 0           | 0.905578                | 1.822389  | 0.718964  |
| 37            | 6             | 0           | -0.020694               | 3.256280  | 2.838663  |
| 38            | 6             | 0           | -2.134446               | 3.051525  | 3.452510  |
| 39            | 6             | 0           | -0.982845               | 3.698329  | 3.774128  |
| 40            | 1             | 0           | 1.016773                | 3.546307  | 2.779743  |
| 41            | 1             | 0           | -3.124065               | 3.064758  | 3.879040  |
| 42            | 1             | 0           | -0.845858               | 4.397309  | 4.582995  |
| 43            | 6             | 0           | -0.649304               | 2.370792  | 2.003838  |
| 44            | 8             | 0           | -1.958969               | 2.249504  | 2.385822  |
| 45            | 28            | 0           | -0.113409               | -0.101627 | -1.503933 |
| 46            | 6             | 0           | -4.011542               | -0.370688 | -0.693730 |
| 47            | 8             | 0           | -6.002591               | -0.985668 | -1.428899 |
| 48            | 16            | 0           | 0.226573                | 2.576639  | -2.535107 |
| 49            | 1             | 0           | -1.097190               | 2.818254  | -2.511161 |
| 50            | 1             | 0           | 0.298773                | 2.584696  | -3.878987 |

Rotational constants (GHZ):

0.1383769

0.0875953

0.0736604





Standard orientation:

| Center<br>Number | Atomic<br>Number | Atomic<br>Type | Coordinates (Angstroms) |           |           |
|------------------|------------------|----------------|-------------------------|-----------|-----------|
|                  |                  |                | X                       | Y         | Z         |
| 1                | 7                | 0              | 1.799740                | -0.108995 | -0.790825 |
| 2                | 8                | 0              | -0.131737               | -1.577873 | -0.396691 |
| 3                | 8                | 0              | -1.840461               | -0.550228 | -1.819432 |
| 4                | 7                | 0              | -0.631630               | 0.823446  | -0.077482 |
| 5                | 7                | 0              | 2.019845                | -1.250997 | -0.074893 |
| 6                | 6                | 0              | 0.910484                | -2.021188 | 0.100270  |
| 7                | 6                | 0              | 2.080338                | -3.886756 | 1.369864  |
| 8                | 6                | 0              | 0.398996                | -5.347734 | 1.943605  |
| 9                | 6                | 0              | 1.744703                | -5.088357 | 2.015608  |
| 10               | 1                | 0              | 3.100249                | -3.525963 | 1.302842  |
| 11               | 1                | 0              | -0.129581               | -6.195420 | 2.356321  |
| 12               | 1                | 0              | 2.454431                | -5.740208 | 2.504641  |
| 13               | 6                | 0              | 0.983350                | -3.254072 | 0.820666  |
| 14               | 1                | 0              | 2.939731                | -1.501381 | 0.252396  |
| 15               | 6                | 0              | 2.810616                | 0.673599  | -0.960283 |
| 16               | 1                | 0              | 2.627141                | 1.509558  | -1.625652 |
| 17               | 6                | 0              | 4.700291                | -0.033947 | 0.652960  |
| 18               | 6                | 0              | 6.567900                | 0.981770  | -0.233653 |
| 19               | 6                | 0              | 6.079933                | 0.198053  | 0.779990  |
| 20               | 1                | 0              | 4.136500                | -0.570643 | 1.405790  |
| 21               | 1                | 0              | 7.590765                | 1.292531  | -0.391704 |
| 22               | 1                | 0              | 6.691755                | -0.186375 | 1.583570  |
| 23               | 6                | 0              | 4.144043                | 0.576615  | -0.461735 |
| 24               | 6                | 0              | -2.553049               | -0.066611 | -0.930364 |
| 25               | 6                | 0              | -4.658233               | -0.838315 | -1.997754 |
| 26               | 6                | 0              | -6.388070               | -0.408815 | -0.530395 |
| 27               | 6                | 0              | -6.043555               | -0.907099 | -1.756996 |
| 28               | 1                | 0              | -4.170926               | -1.174257 | -2.903340 |
| 29               | 1                | 0              | -7.373398               | -0.348219 | -0.090978 |
| 30               | 1                | 0              | -6.767345               | -1.307763 | -2.452061 |



Standard orientation:

| Center<br>Number            | Atomic<br>Number | Atomic<br>Type | Coordinates (Angstroms) |           |           |
|-----------------------------|------------------|----------------|-------------------------|-----------|-----------|
|                             |                  |                | X                       | Y         | Z         |
| 1                           | 7                | 0              | 1.944116                | 0.307500  | -1.057998 |
| 2                           | 8                | 0              | 0.172392                | -1.362490 | -0.472241 |
| 3                           | 8                | 0              | -1.730590               | -0.515242 | -1.843288 |
| 4                           | 7                | 0              | -0.567171               | 1.044678  | -0.211718 |
| 5                           | 7                | 0              | 2.271514                | -0.726382 | -0.216990 |
| 6                           | 6                | 0              | 1.254020                | -1.581092 | 0.085128  |
| 7                           | 6                | 0              | 2.538413                | -3.032492 | 1.722629  |
| 8                           | 6                | 0              | 1.057832                | -4.680595 | 2.330616  |
| 9                           | 6                | 0              | 2.327786                | -4.186050 | 2.494552  |
| 10                          | 1                | 0              | 3.484303                | -2.503952 | 1.715719  |
| 11                          | 1                | 0              | 0.630445                | -5.553607 | 2.803583  |
| 12                          | 1                | 0              | 3.067414                | -4.637178 | 3.140427  |
| 13                          | 6                | 0              | 1.428687                | -2.672332 | 0.986877  |
| 14                          | 1                | 0              | 3.195058                | -0.804621 | 0.171856  |
| 15                          | 6                | 0              | 2.914921                | 1.098008  | -1.383406 |
| 16                          | 1                | 0              | 2.647868                | 1.901862  | -2.064044 |
| 17                          | 6                | 0              | 5.183064                | 0.369930  | -0.280564 |
| 18                          | 6                | 0              | 6.244437                | 2.033820  | -1.275413 |
| 19                          | 6                | 0              | 6.442882                | 0.975588  | -0.433603 |
| 20                          | 1                | 0              | 5.007604                | -0.508107 | 0.322894  |
| 21                          | 1                | 0              | 6.912933                | 2.775413  | -1.683671 |
| 22                          | 1                | 0              | 7.377207                | 0.671473  | 0.009528  |
| 23                          | 6                | 0              | 4.290254                | 1.099639  | -1.043462 |
| 24                          | 6                | 0              | -2.469734               | 0.053011  | -1.018612 |
| 25                          | 6                | 0              | -4.490071               | -1.027427 | -1.946321 |
| 26                          | 6                | 0              | -6.291578               | -0.405148 | -0.643820 |
| 27                          | 6                | 0              | -5.876812               | -1.125071 | -1.731460 |
| 28                          | 1                | 0              | -3.957932               | -1.510349 | -2.754263 |
| 29                          | 1                | 0              | -7.295284               | -0.308093 | -0.255181 |
| 30                          | 1                | 0              | -6.554525               | -1.700860 | -2.345200 |
| 31                          | 7                | 0              | -1.928255               | 0.954305  | -0.172088 |
| 32                          | 1                | 0              | -2.460613               | 1.471052  | 0.518529  |
| 33                          | 6                | 0              | -0.025788               | 1.884449  | 0.597731  |
| 34                          | 1                | 0              | 1.049786                | 1.969931  | 0.524154  |
| 35                          | 6                | 0              | 0.044738                | 3.586302  | 2.455185  |
| 36                          | 6                | 0              | -2.133305               | 3.612899  | 2.843315  |
| 37                          | 6                | 0              | -0.961941               | 4.165816  | 3.258432  |
| 38                          | 1                | 0              | 1.105401                | 3.781421  | 2.492052  |
| 39                          | 1                | 0              | -3.157432               | 3.740981  | 3.153942  |
| 40                          | 1                | 0              | -0.842597               | 4.896656  | 4.042077  |
| 41                          | 6                | 0              | -0.578310               | 2.714326  | 1.600724  |
| 42                          | 16               | 0              | 0.114439                | -3.768557 | 1.247636  |
| 43                          | 16               | 0              | -5.006209               | 0.397328  | 0.143291  |
| 44                          | 6                | 0              | -3.871099               | -0.230228 | -1.008643 |
| 45                          | 8                | 0              | -1.925061               | 2.735369  | 1.843639  |
| 46                          | 8                | 0              | 4.968767                | 2.123791  | -1.640885 |
| 47                          | 28               | 0              | 0.070102                | -0.020522 | -1.756886 |
| Rotational constants (GHZ): |                  |                | 0.1446323               | 0.0813105 | 0.0684826 |

Standard orientation:

| Center<br>Number | Atomic<br>Number | Atomic<br>Type | Coordinates (Angstroms) |           |           |
|------------------|------------------|----------------|-------------------------|-----------|-----------|
|                  |                  |                | X                       | Y         | Z         |
| 1                | 7                | 0              | -1.926273               | -0.191418 | -0.770548 |
| 2                | 8                | 0              | -0.057637               | 1.393361  | -0.510634 |
| 3                | 8                | 0              | 1.728614                | 0.280909  | -1.753454 |
| 4                | 7                | 0              | 0.533770                | -0.931799 | 0.091062  |
| 5                | 7                | 0              | -2.192801               | 1.003355  | -0.163985 |
| 6                | 6                | 0              | -1.114332               | 1.828743  | -0.042124 |
| 7                | 6                | 0              | -2.366586               | 3.704969  | 1.126878  |
| 8                | 6                | 0              | -0.786476               | 5.343373  | 1.462143  |
| 9                | 6                | 0              | -2.102499               | 4.990369  | 1.627652  |
| 10               | 1                | 0              | -3.351471               | 3.254620  | 1.161907  |
| 11               | 1                | 0              | -0.313372               | 6.268843  | 1.758749  |
| 12               | 1                | 0              | -2.840094               | 5.632244  | 2.088131  |
| 13               | 6                | 0              | -1.244602               | 3.103262  | 0.593286  |
| 14               | 1                | 0              | -3.107507               | 1.218081  | 0.191481  |
| 15               | 6                | 0              | -2.915900               | -1.009306 | -0.884723 |
| 16               | 1                | 0              | -2.700655               | -1.941260 | -1.393810 |
| 17               | 6                | 0              | -5.130076               | 0.040968  | 0.067693  |
| 18               | 6                | 0              | -6.247776               | -1.801669 | -0.411424 |
| 19               | 6                | 0              | -6.403117               | -0.557741 | 0.127691  |
| 20               | 1                | 0              | -4.924157               | 1.044134  | 0.408483  |
| 21               | 1                | 0              | -6.939624               | -2.610995 | -0.580847 |
| 22               | 1                | 0              | -7.314566               | -0.129658 | 0.511929  |
| 23               | 6                | 0              | -4.276648               | -0.875634 | -0.514158 |
| 24               | 6                | 0              | 2.441655                | -0.075488 | -0.804361 |
| 25               | 6                | 0              | 4.543396                | 0.657459  | -1.909375 |
| 26               | 6                | 0              | 6.249668                | 0.467329  | -0.366095 |
| 27               | 6                | 0              | 5.918530                | 0.810596  | -1.648331 |
| 28               | 1                | 0              | 4.066387                | 0.868908  | -2.857126 |
| 29               | 1                | 0              | 7.224932                | 0.497904  | 0.098205  |
| 30               | 1                | 0              | 6.643477                | 1.162171  | -2.368340 |
| 31               | 7                | 0              | 1.884042                | -0.801103 | 0.185941  |
| 32               | 1                | 0              | 2.389050                | -1.204498 | 0.964976  |
| 33               | 6                | 0              | -0.012152               | -1.738363 | 0.928882  |
| 34               | 1                | 0              | -1.071805               | -1.896722 | 0.785707  |
| 35               | 6                | 0              | -0.135681               | -3.217147 | 2.972037  |
| 36               | 6                | 0              | 1.998352                | -3.035963 | 3.521657  |
| 37               | 6                | 0              | 0.837417                | -3.626636 | 3.911150  |
| 38               | 1                | 0              | -1.181644               | -3.480649 | 2.955041  |
| 39               | 1                | 0              | 2.998282                | -3.051187 | 3.923267  |
| 40               | 1                | 0              | 0.702013                | -4.271365 | 4.764111  |
| 41               | 6                | 0              | 0.495069                | -2.401580 | 2.070020  |
| 42               | 16               | 0              | 0.141284                | 4.132709  | 0.706634  |
| 43               | 16               | 0              | 4.900025                | -0.046227 | 0.545945  |
| 44               | 6                | 0              | 3.850930                | 0.188182  | -0.816030 |
| 45               | 8                | 0              | 1.816083                | -2.295701 | 2.413075  |
| 46               | 8                | 0              | -4.990652               | -2.006949 | -0.794517 |
| 47               | 28               | 0              | -0.080708               | -0.141267 | -1.574719 |
| 48               | 16               | 0              | -0.422132               | -2.881343 | -2.408517 |
| 49               | 1                | 0              | -0.502935               | -2.989439 | -3.747721 |
| 50               | 1                | 0              | 0.919228                | -2.998405 | -2.384832 |

Rotational constants (GHZ):

0.1253792

0.0808957

0.0658211

Standard orientation:

| Center<br>Number | Atomic<br>Number | Atomic<br>Type | Coordinates (Angstroms) |           |           |
|------------------|------------------|----------------|-------------------------|-----------|-----------|
|                  |                  |                | X                       | Y         | Z         |
| 1                | 6                | 0              | 1.348193                | 1.024430  | 0.034184  |
| 2                | 8                | 0              | 1.271702                | 2.245389  | 0.072376  |
| 3                | 7                | 0              | 0.053754                | 0.400115  | -0.009344 |
| 4                | 7                | 0              | -0.210125               | -0.881718 | 0.144661  |
| 5                | 6                | 0              | -1.415809               | -1.335523 | 0.173655  |
| 6                | 1                | 0              | -1.500012               | -2.410224 | 0.303362  |
| 7                | 6                | 0              | -2.686958               | -0.647482 | 0.062059  |
| 8                | 6                | 0              | -3.964149               | -1.136023 | 0.085469  |
| 9                | 6                | 0              | -4.832977               | -0.013117 | -0.063209 |
| 10               | 6                | 0              | -4.031373               | 1.074473  | -0.166056 |
| 11               | 6                | 0              | 2.545924                | 0.226542  | 0.004530  |
| 12               | 6                | 0              | 4.672324                | -0.105388 | 0.028586  |
| 13               | 6                | 0              | 4.094928                | -1.379444 | -0.181702 |
| 14               | 6                | 0              | 2.720617                | -1.166762 | -0.194962 |
| 15               | 1                | 0              | -0.688569               | 1.091324  | -0.032245 |
| 16               | 1                | 0              | -4.238843               | -2.173090 | 0.195788  |
| 17               | 1                | 0              | -5.911401               | -0.014286 | -0.090354 |
| 18               | 1                | 0              | -4.214416               | 2.128330  | -0.289724 |
| 19               | 1                | 0              | 5.731101                | 0.127560  | 0.103968  |
| 20               | 1                | 0              | 4.613422                | -2.322922 | -0.305279 |
| 21               | 1                | 0              | 1.944714                | -1.903736 | -0.325142 |
| 22               | 7                | 0              | 3.760096                | 0.856704  | 0.136175  |
| 23               | 8                | 0              | -2.730000               | 0.704749  | -0.091895 |

Rotational constants (GHZ):

2.0335666

0.2652676

0.2353042



---

Standard orientation:

---

| Center<br>Number | Atomic<br>Number | Atomic<br>Type | Coordinates (Angstroms) |           |           |
|------------------|------------------|----------------|-------------------------|-----------|-----------|
|                  |                  |                | X                       | Y         | Z         |
| 1                | 7                | 0              | 0.533439                | 1.200448  | -0.509986 |
| 2                | 8                | 0              | 1.910609                | -0.644316 | -1.471294 |
| 3                | 8                | 0              | -1.556054               | 0.577832  | -1.782153 |
| 4                | 7                | 0              | -0.377240               | -1.192044 | -0.496188 |
| 5                | 7                | 0              | 1.815929                | 1.107571  | -0.101887 |
| 6                | 6                | 0              | 2.528277                | 0.127094  | -0.713978 |
| 7                | 6                | 0              | 4.890705                | 0.596810  | 0.224097  |
| 8                | 6                | 0              | 5.759970                | -1.123919 | -0.856707 |
| 9                | 6                | 0              | 6.087312                | -0.111546 | 0.002542  |
| 10               | 1                | 0              | 4.772050                | 1.465136  | 0.855152  |
| 11               | 1                | 0              | 6.342694                | -1.908445 | -1.313276 |
| 12               | 1                | 0              | 7.063681                | 0.098008  | 0.408444  |
| 13               | 6                | 0              | 3.921617                | -0.042875 | -0.511889 |
| 14               | 1                | 0              | 2.203025                | 1.742930  | 0.580632  |
| 15               | 6                | 0              | -0.200492               | 2.151260  | 0.068369  |
| 16               | 1                | 0              | -1.152809               | 2.338202  | -0.407364 |
| 17               | 6                | 0              | 1.117560                | 3.042068  | 2.150775  |
| 18               | 6                | 0              | -0.433217               | 4.666939  | 2.363180  |
| 19               | 6                | 0              | 0.805761                | 4.093320  | 2.932265  |
| 20               | 1                | 0              | 1.924593                | 2.347556  | 2.337286  |
| 21               | 1                | 0              | -0.955870               | 5.538560  | 2.737991  |
| 22               | 1                | 0              | 1.324712                | 4.446317  | 3.812121  |
| 23               | 6                | 0              | 0.073629                | 2.987538  | 1.127599  |
| 24               | 6                | 0              | -2.278479               | -0.096978 | -1.017412 |
| 25               | 6                | 0              | -4.479610               | 1.004971  | -1.611131 |
| 26               | 6                | 0              | -5.657987               | -0.150320 | -0.128904 |
| 27               | 6                | 0              | -5.774799               | 0.811571  | -1.094970 |
| 28               | 1                | 0              | -4.164663               | 1.680034  | -2.391421 |
| 29               | 1                | 0              | -6.375828               | -0.614470 | 0.529014  |
| 30               | 1                | 0              | -6.684867               | 1.309108  | -1.388294 |

---
